# Supplementary material for: Genomic prediction with whole-genome sequence data in intensely selected pig lines
Source: PubMed Central journal article supplement (PMC9509613; doi:10.1186/s12711-022-00756-0), 2022-09-24

## Additional File 2: Figure S2

### Prediction accuracy for all traits and lines

Left: Correlation. Dashed line at value of Chip as a reference. Values indicate relative difference to reference Chip. Right: Bias. Dashed line at the ideal value.

#### ADG

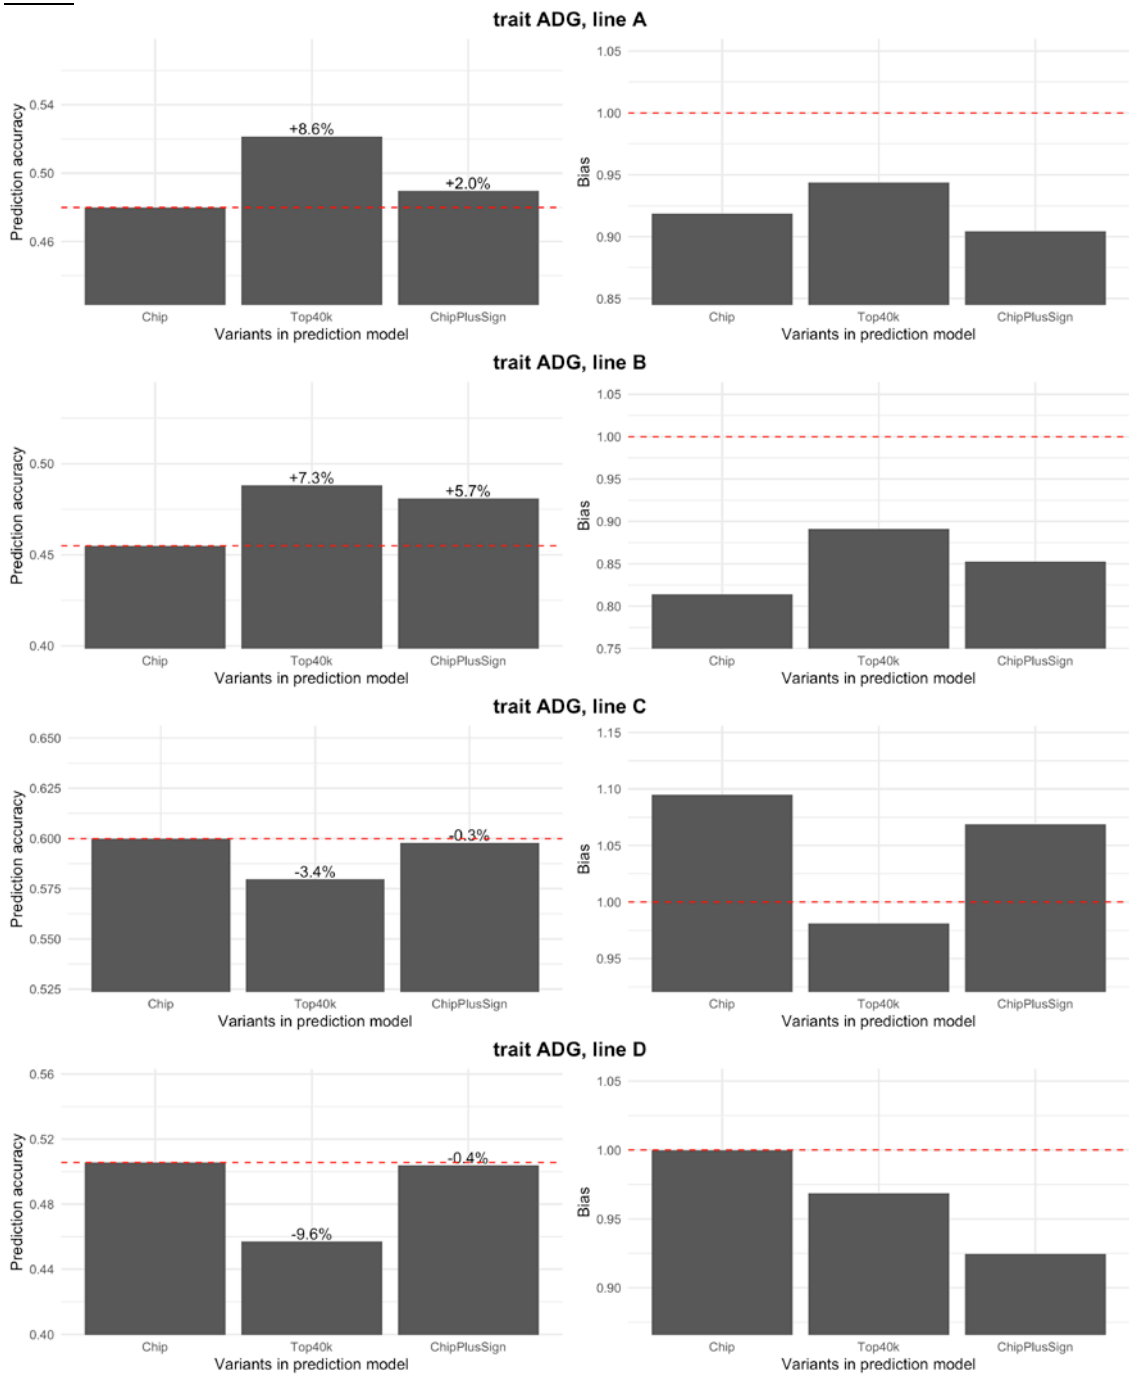

trait ADG, line E

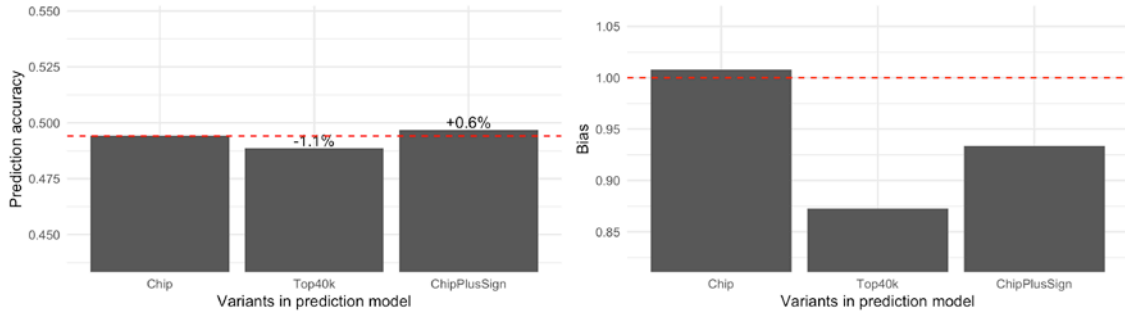

trait ADG, line F

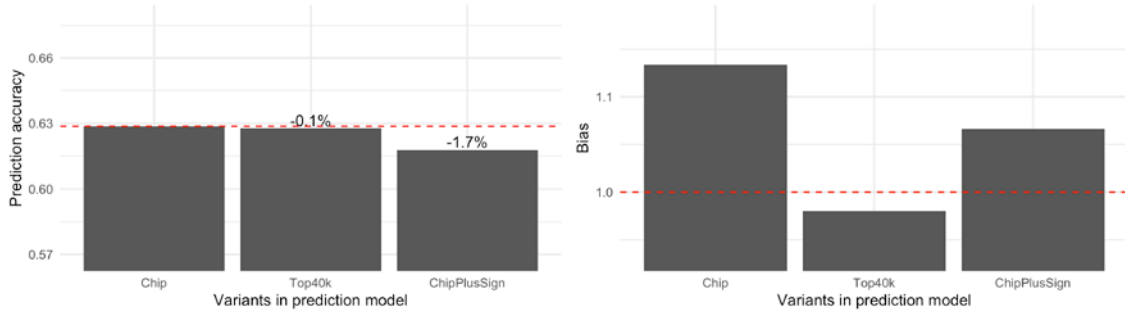

trait ADG, line G

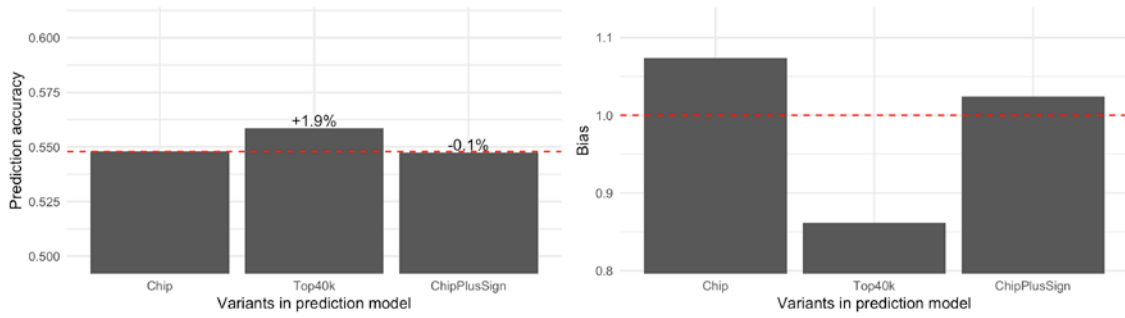

BFT

trait BFT, line A

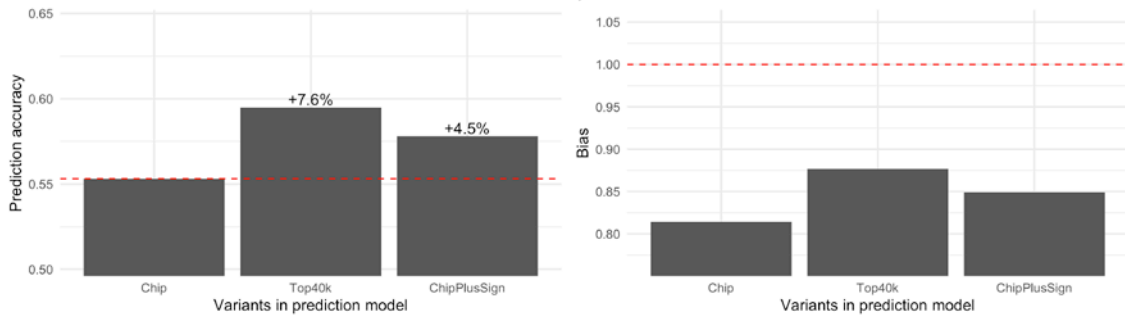

trait BFT, line B

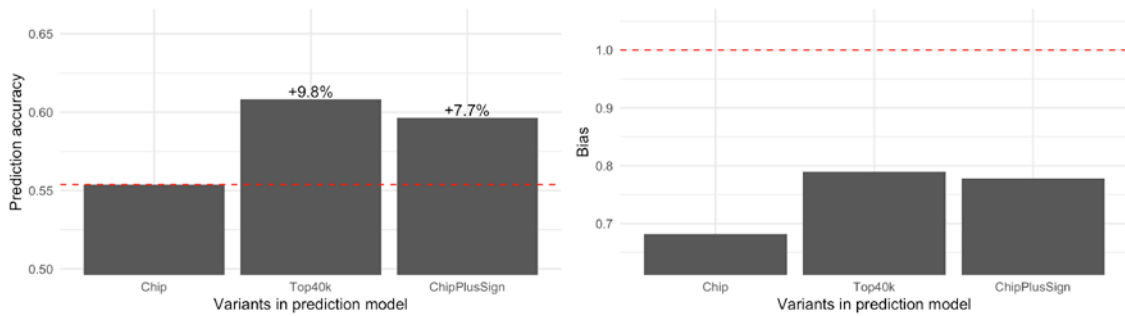

trait BFT, line C

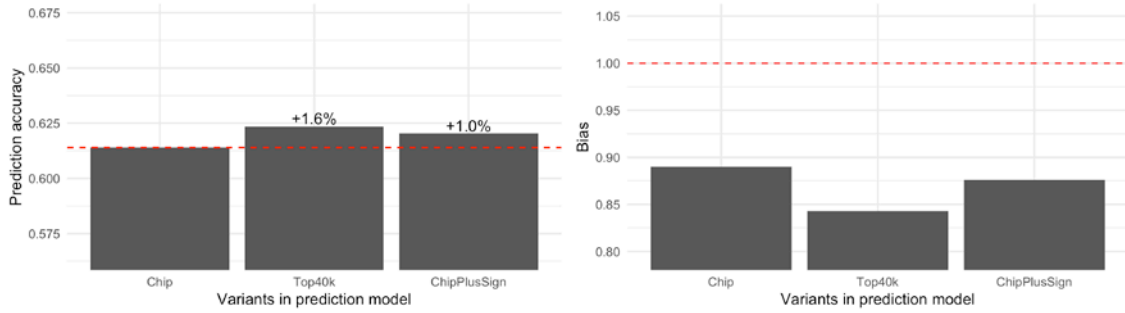

trait BFT, line D

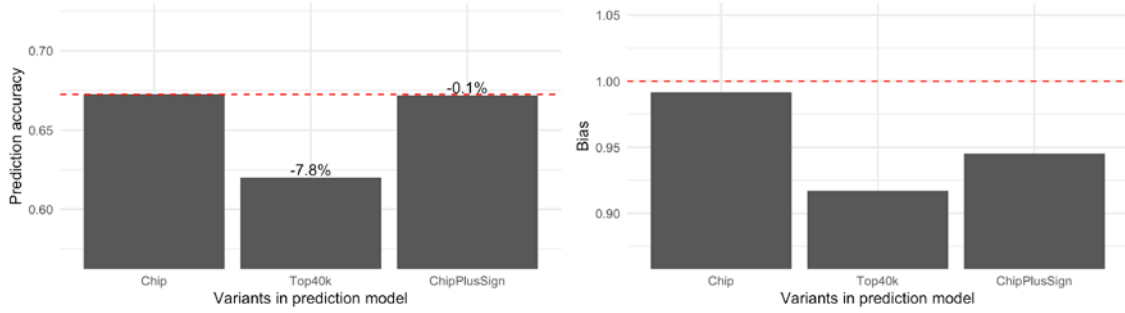

trait BFT, line E

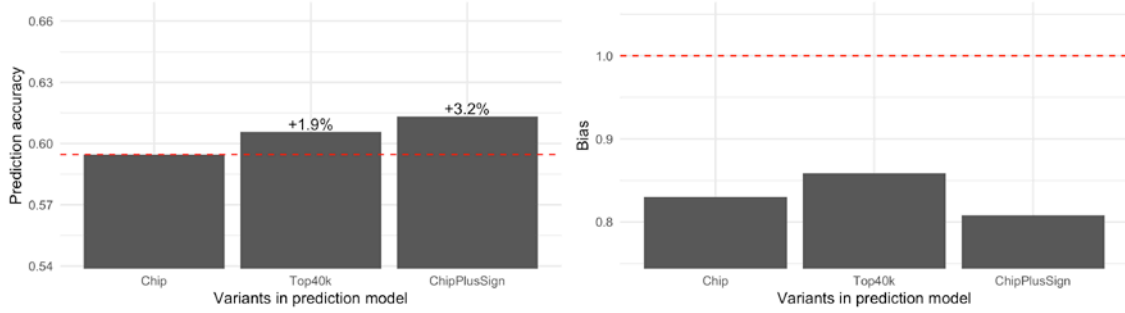

trait BFT, line F

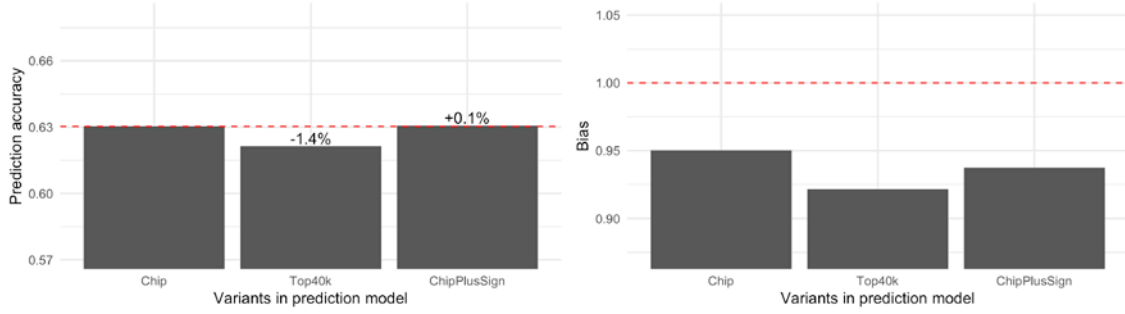

trait BFT, line G

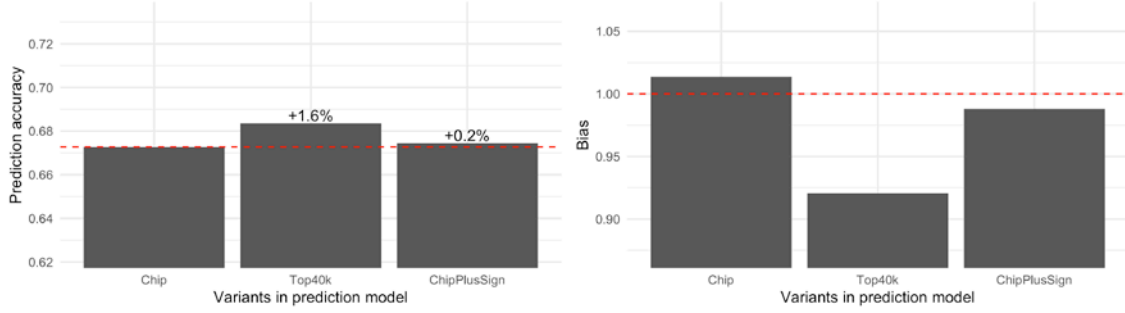

# LD

### trait LD, line A

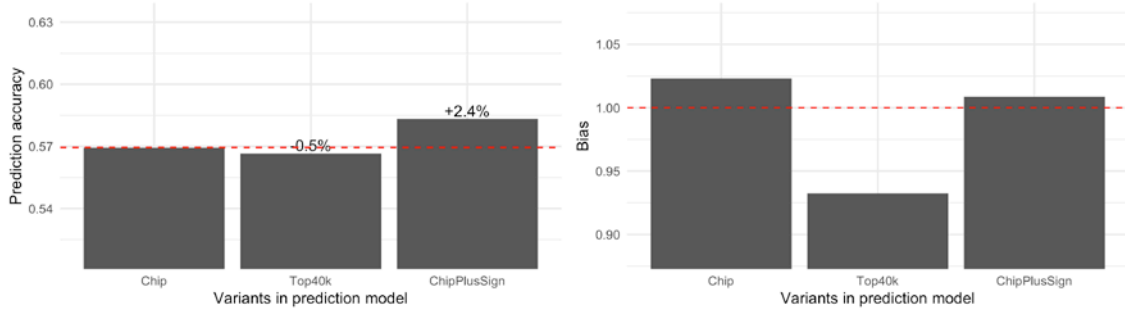

### trait LD, line B

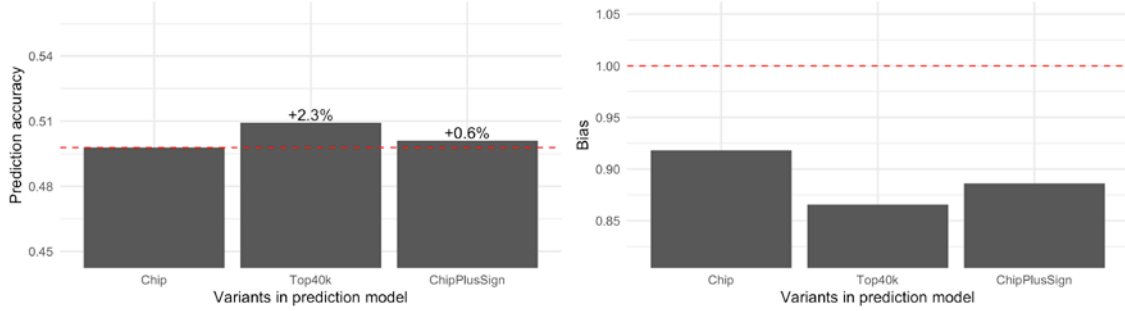

### trait LD, line C

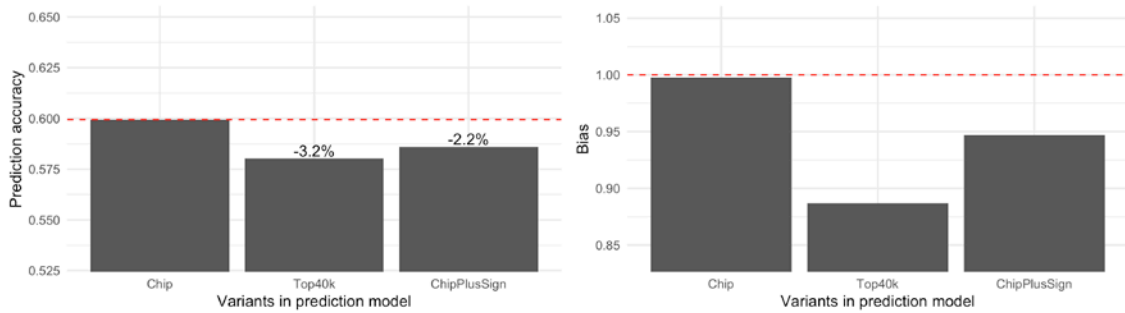

### trait LD, line D

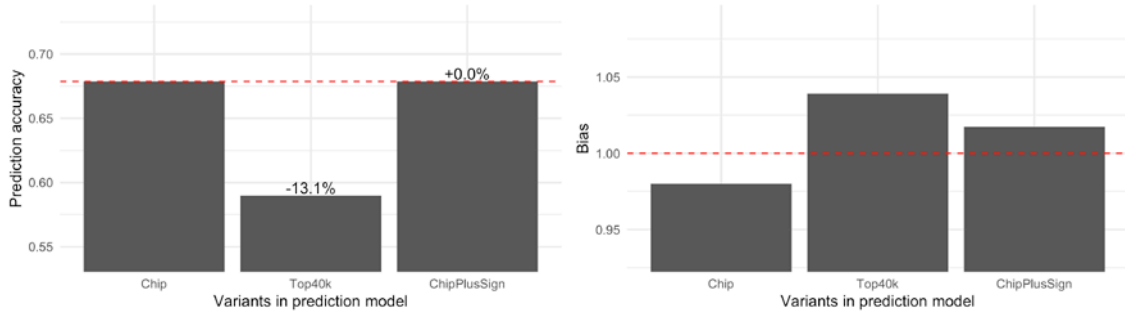

### trait LD, line E

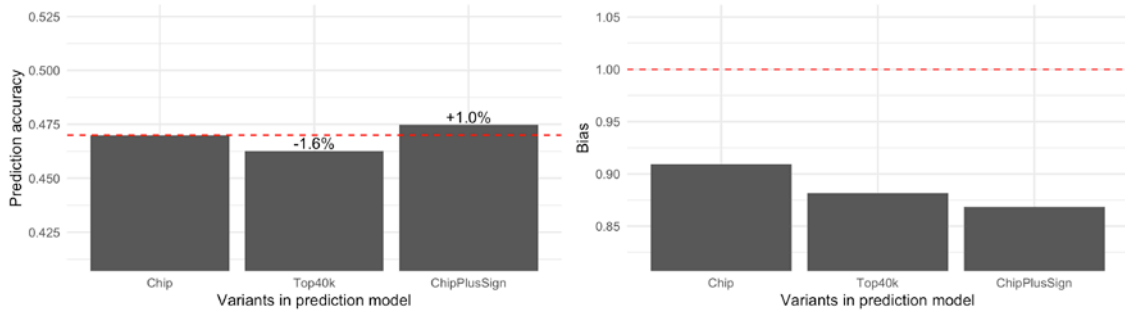

trait LD, line F

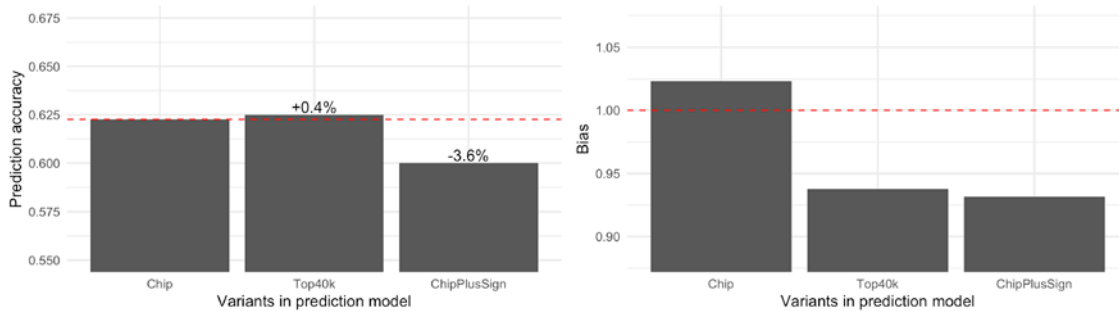

trait LD, line G

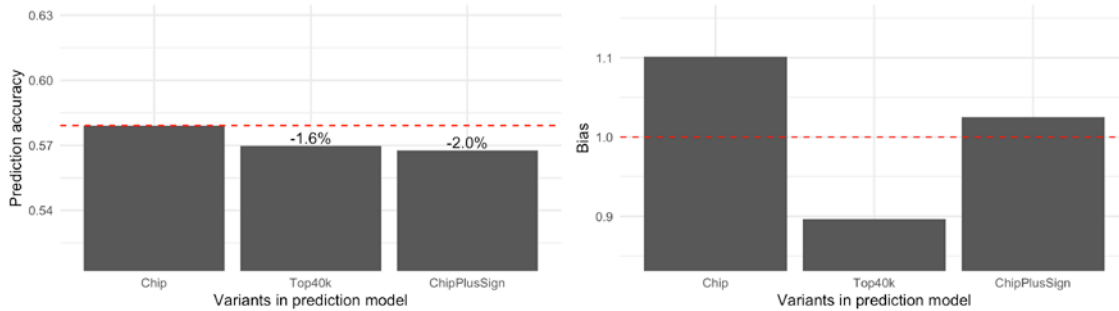

ADFI

trait ADFI, line A

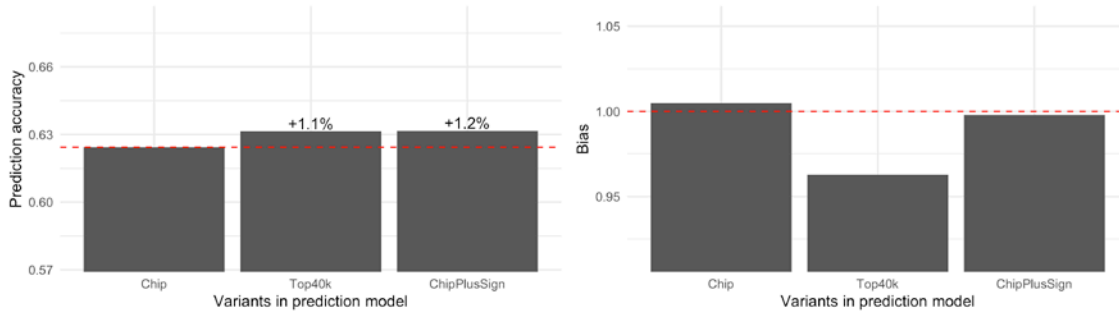

trait ADFI, line B

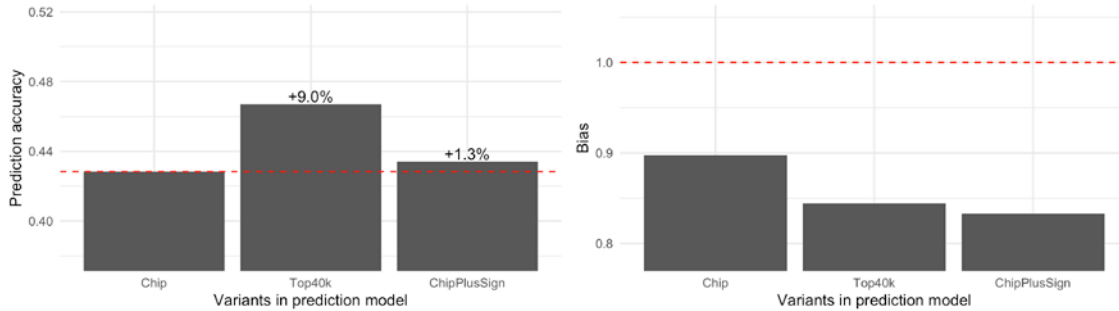

trait ADFI, line C

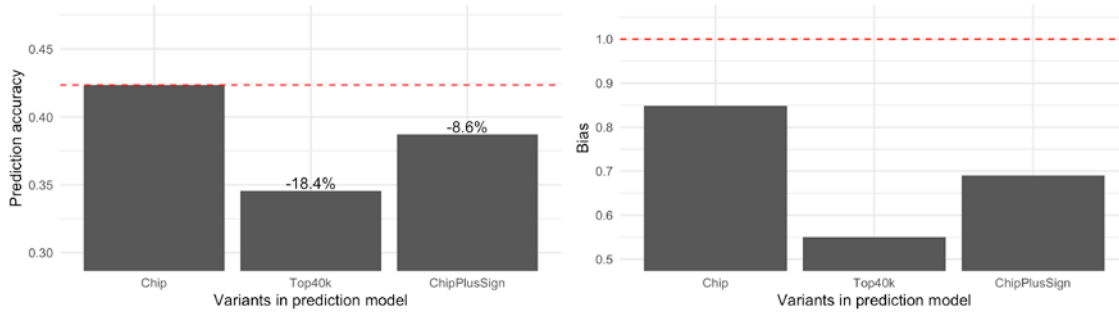

trait ADFI, line D

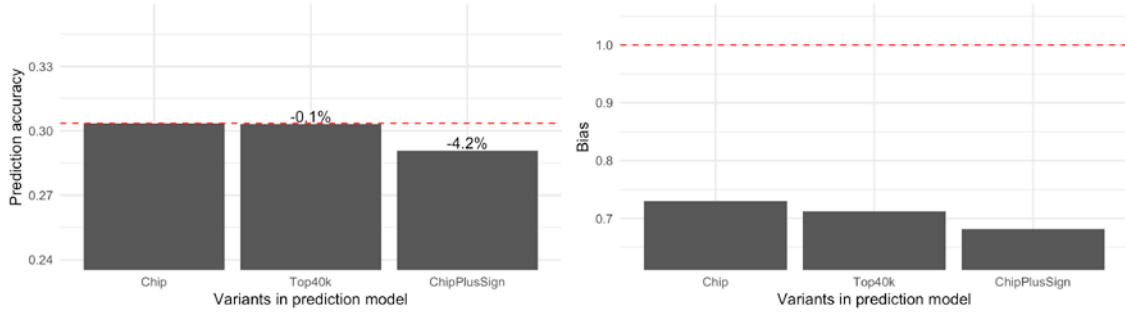

trait ADFI, line E

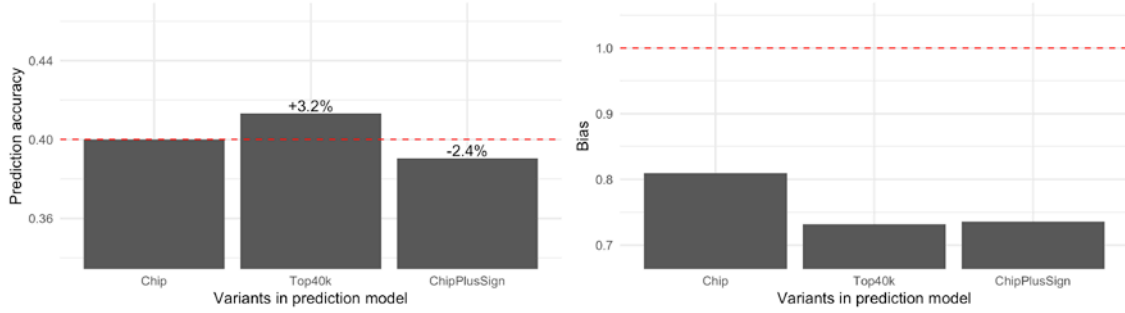

trait ADFI, line G

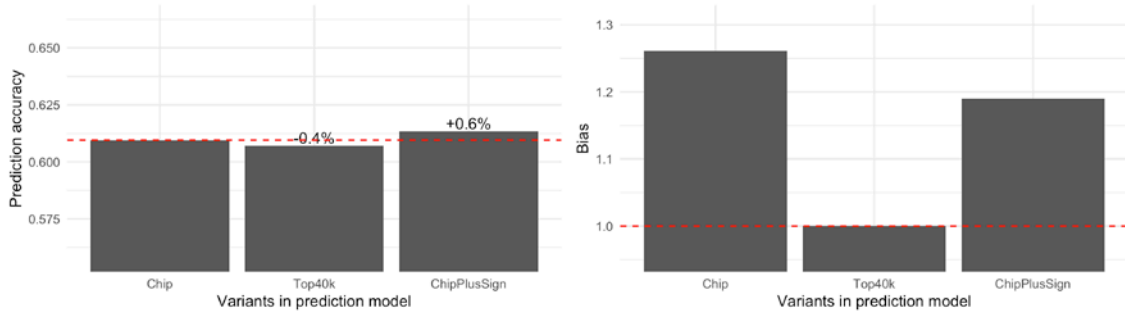

FCR

trait FCR, line A

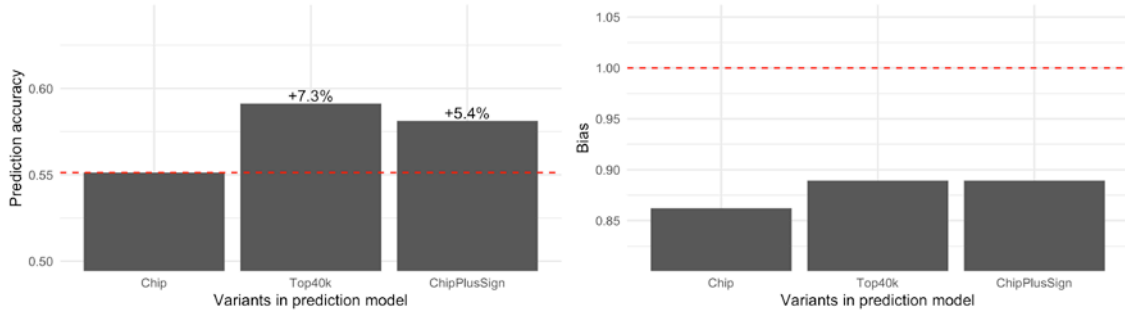

trait FCR, line B

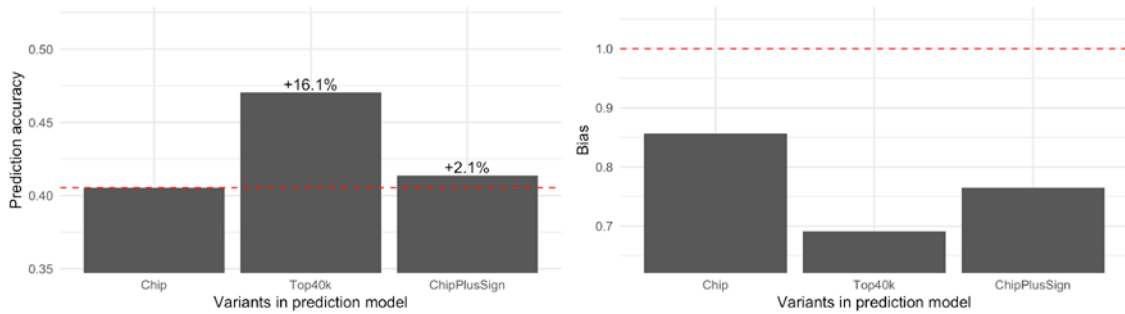

trait FCR, line C

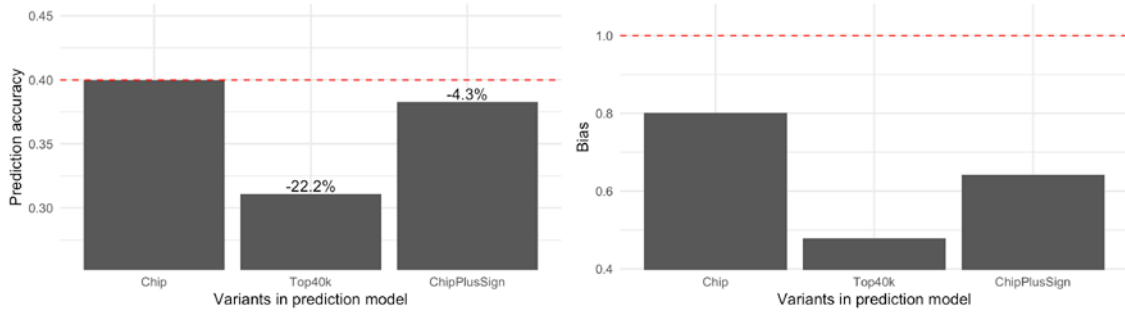

trait FCR, line D

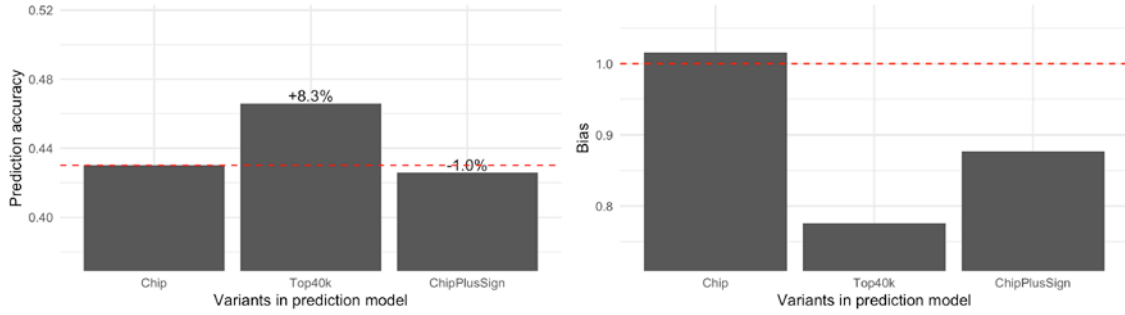

trait FCR, line E

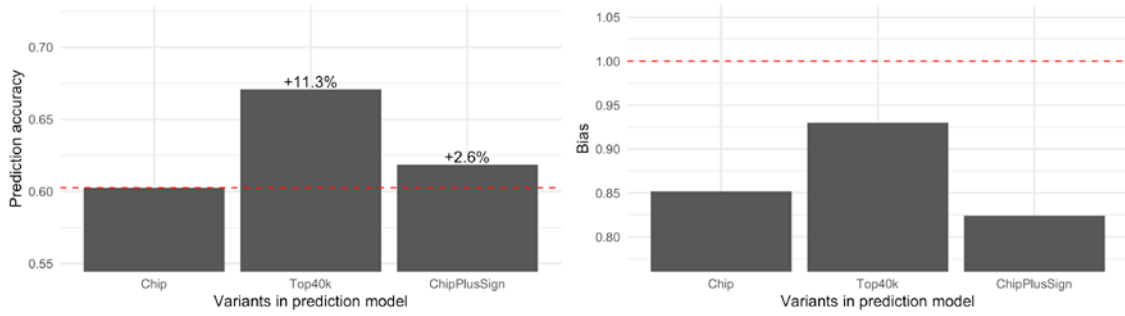

trait FCR, line G

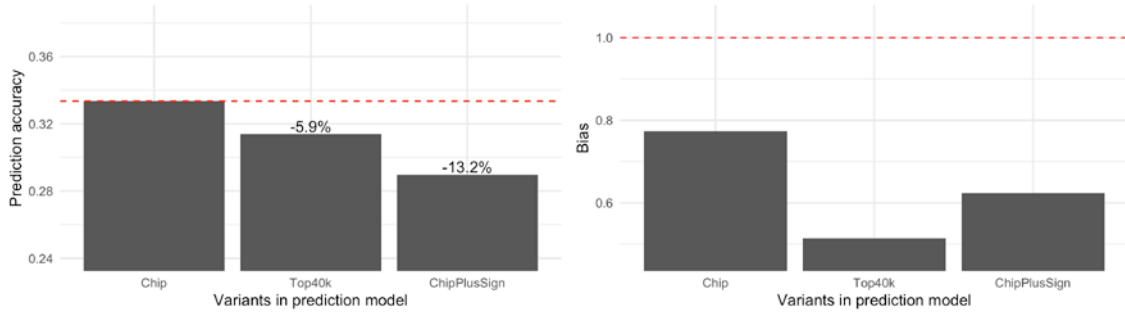

TNB

trait TNB, line A

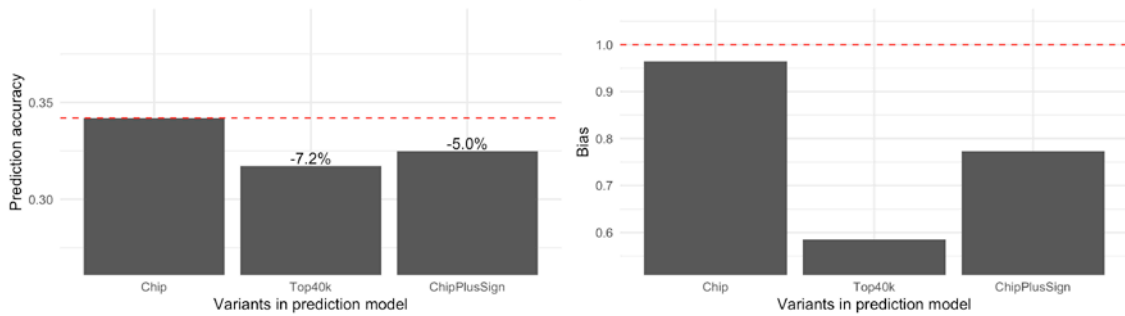

trait TNB, line B

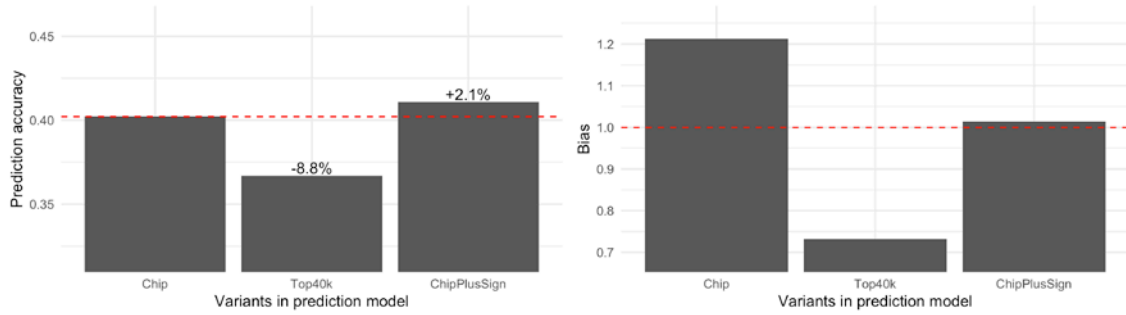

trait TNB, line C

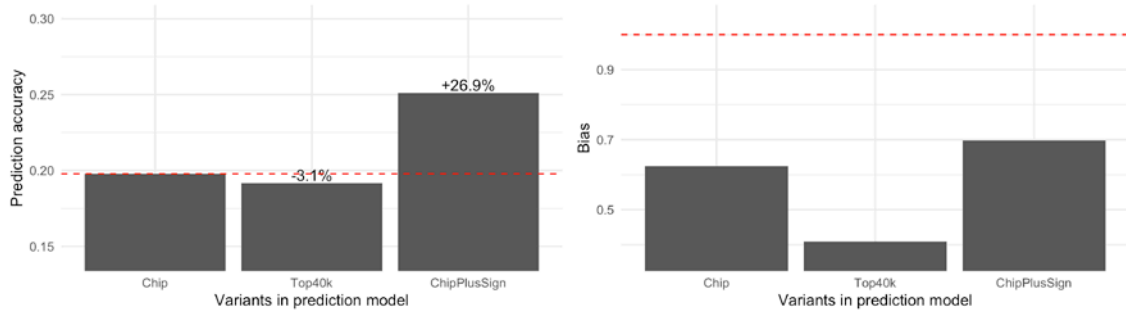

LWW

trait LWW, line B

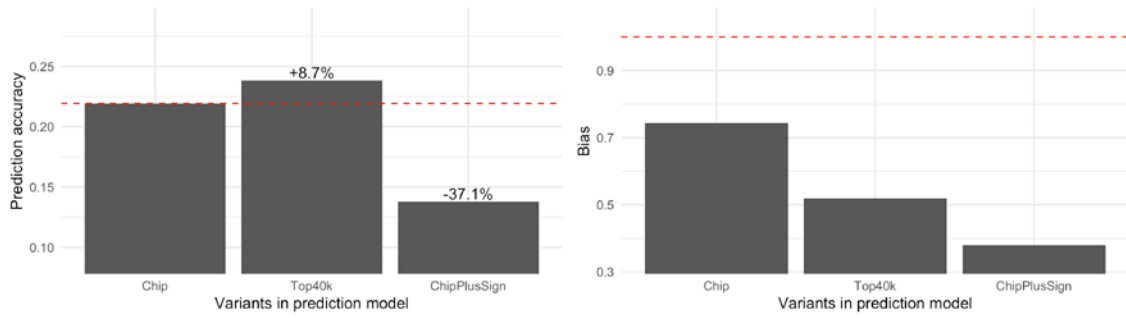

trait LWW, line C

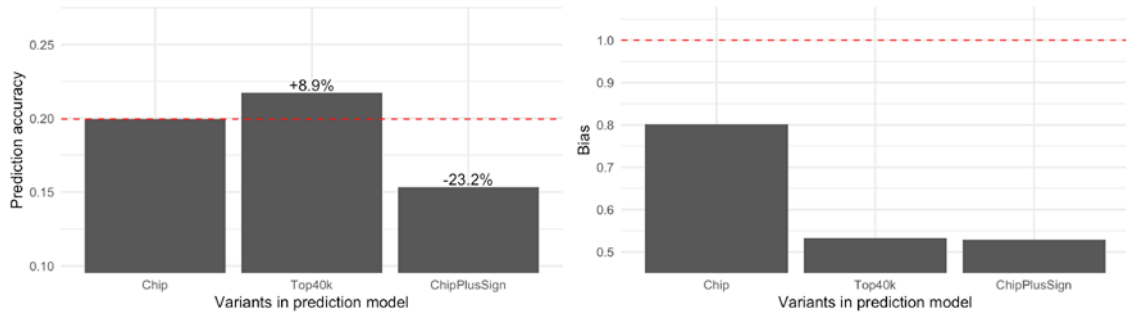



# RET

### trait RET, line B

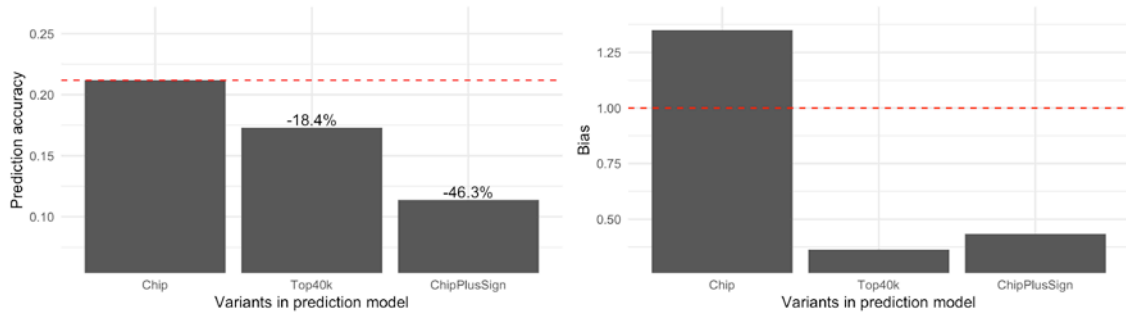

### trait RET, line C

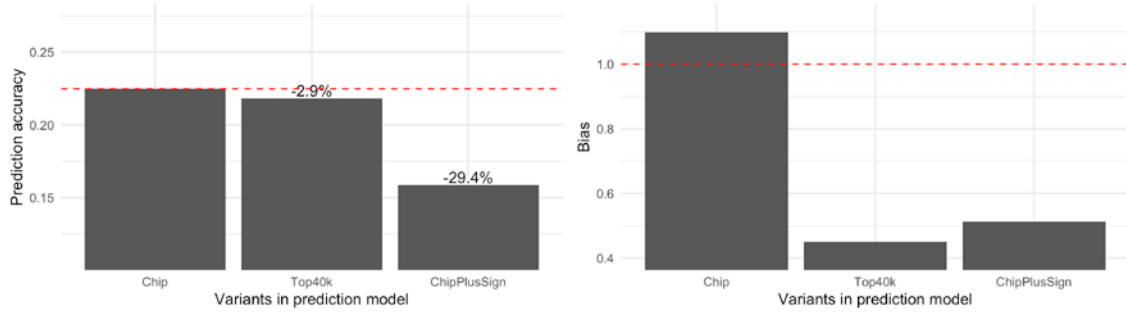

Supplement: 12711_2022_756_MOESM2_ESM.pdf [file 12711_2022_756_MOESM2_ESM.pdf]
