# Supplementary material for: Genomic prediction with whole-genome sequence data in intensely selected pig lines
Source: PubMed Central journal article supplement (PMC9509613; doi:10.1186/s12711-022-00756-0), 2022-09-24
Supplement: 12711_2022_756_MOESM1_ESM.pdf [file 12711_2022_756_MOESM1_ESM.pdf]

**Additional File 1**

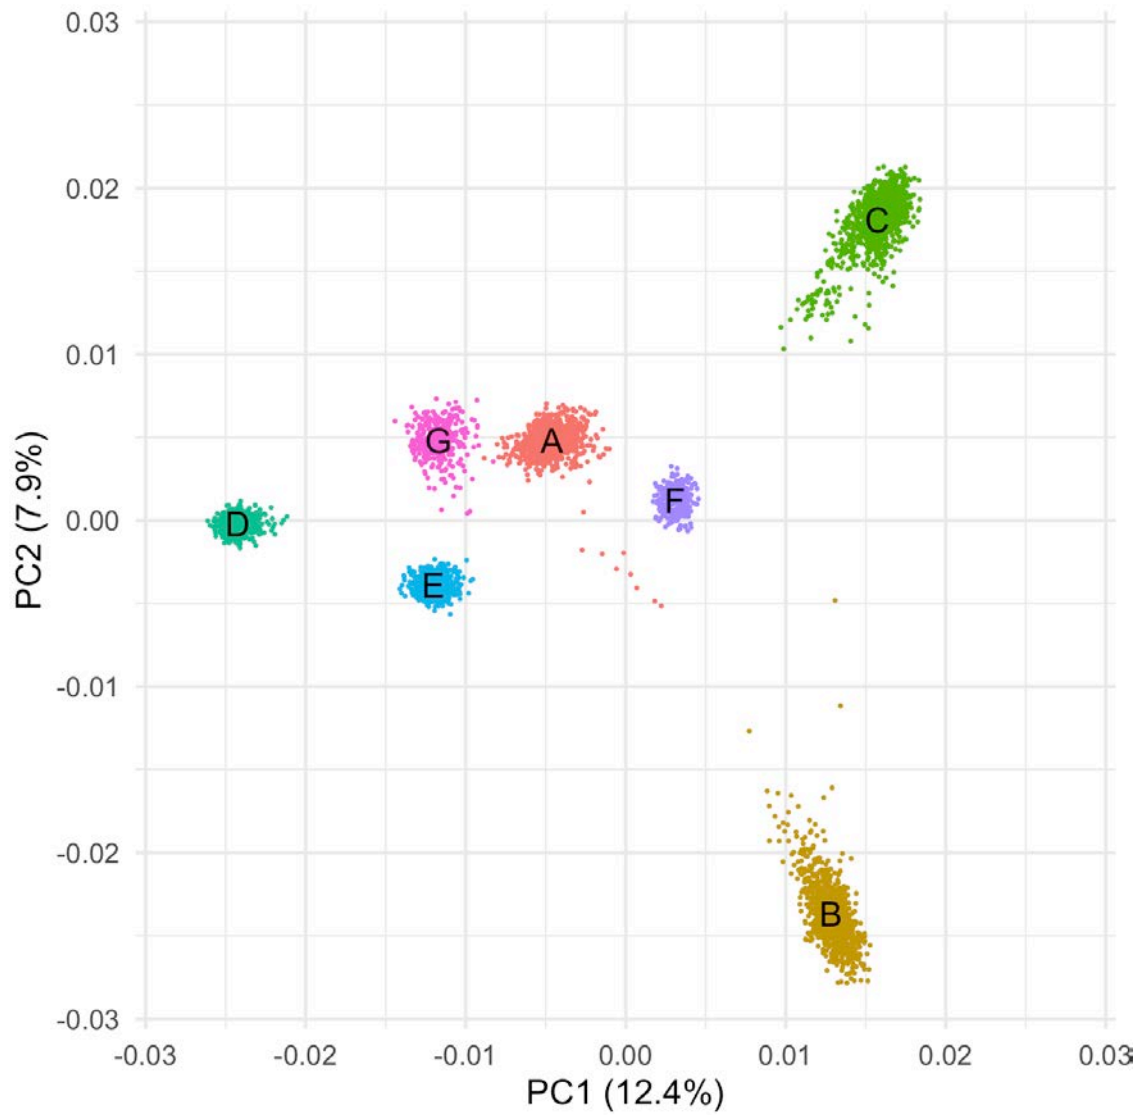

**Figure S1.** Population structure of the sequenced pigs according to the two first principal components. The colour clusters correspond to lines A to G.
