# Supplementary material for: Genomic prediction with whole-genome sequence data in intensely selected pig lines
Source: PubMed Central journal article supplement (PMC9509613; doi:10.1186/s12711-022-00756-0), 2022-09-24
Supplement: 12711_2022_756_MOESM3_ESM.pdf [file 12711_2022_756_MOESM3_ESM.pdf]

### Additional File 3

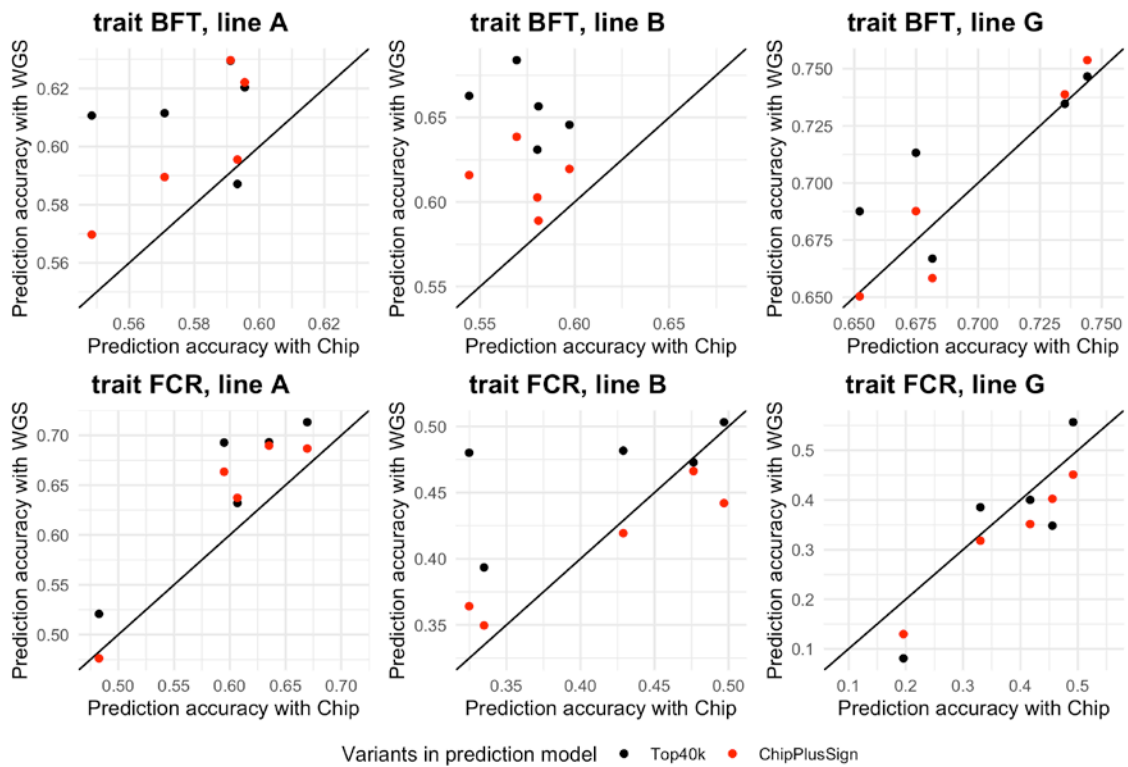

**Figure S3.** Genomic prediction accuracy obtained with each set of preselected whole-genome sequence (WGS) variants (either Top40k or ChipPlusSign) against that obtained with the marker array (Chip) in each of the five replicates.
