# Supplementary material for: Genomic prediction with whole-genome sequence data in intensely selected pig lines
Source: PubMed Central journal article supplement (PMC9509613; doi:10.1186/s12711-022-00756-0), 2022-09-24
Supplement: 12711_2022_756_MOESM4_ESM.pdf [file 12711_2022_756_MOESM4_ESM.pdf]

## Additional File 4

**Table S1.** Comparison of the results obtained with a single replicate or with five replicates. The difference of the genomic prediction accuracy between each set of preselected whole-genome sequence variants (either Top40k or ChipPlusSign) and the marker array (Chip) is reported.

| Trait | Line | Top40k – Chip    |                 |       | ChipPlusSign – Chip |                 |       |
|-------|------|------------------|-----------------|-------|---------------------|-----------------|-------|
|       |      | Single replicate | Five replicates |       | Single replicate    | Five replicates |       |
|       |      |                  | Mean            | SD    |                     | Mean            | SD    |
| BFT   | A    | 0.042            | 0.032           | 0.025 | 0.025               | 0.021           | 0.013 |
| BFT   | B    | 0.054            | 0.082           | 0.034 | 0.043               | 0.039           | 0.030 |
| BFT   | G    | 0.011            | 0.012           | 0.023 | 0.002               | 0.000           | 0.014 |
| FCR   | A    | 0.040            | 0.053           | 0.028 | 0.030               | 0.033           | 0.030 |
| FCR   | B    | 0.065            | 0.054           | 0.063 | 0.009               | -0.004          | 0.035 |
| FCR   | G    | -0.020           | -0.024          | 0.086 | -0.044              | -0.048          | 0.022 |
