# Supplementary material for: Genomic prediction with whole-genome sequence data in intensely selected pig lines
Source: PubMed Central journal article supplement (PMC9509613; doi:10.1186/s12711-022-00756-0), 2022-09-24
Supplement: 12711_2022_756_MOESM6_ESM.pdf [file 12711_2022_756_MOESM6_ESM.pdf]

**Additional File 6: Figure S5**

**Genomic prediction accuracy of whole-genome sequence data in multi-line scenarios compared to the marker arrays in within-line scenarios**

ML-ChipPlusSign

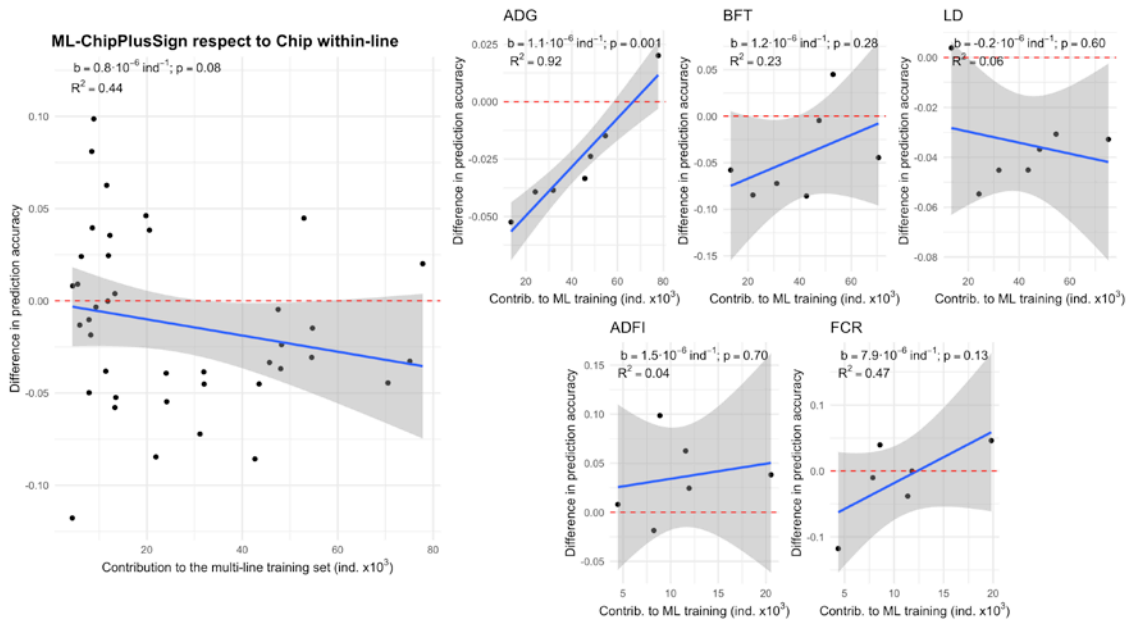

Difference of prediction accuracy between ML-ChipPlusSign and Chip in the within-line scenarios, for all traits and lines (left) or by trait (right). Red dashed line at ‘no difference’. Regression coefficient (b) and p-value of training set size is provided, as well as the coefficient of determination ( $R^2$ ) of the model. The linear model for the joint analyses included the trait effect.

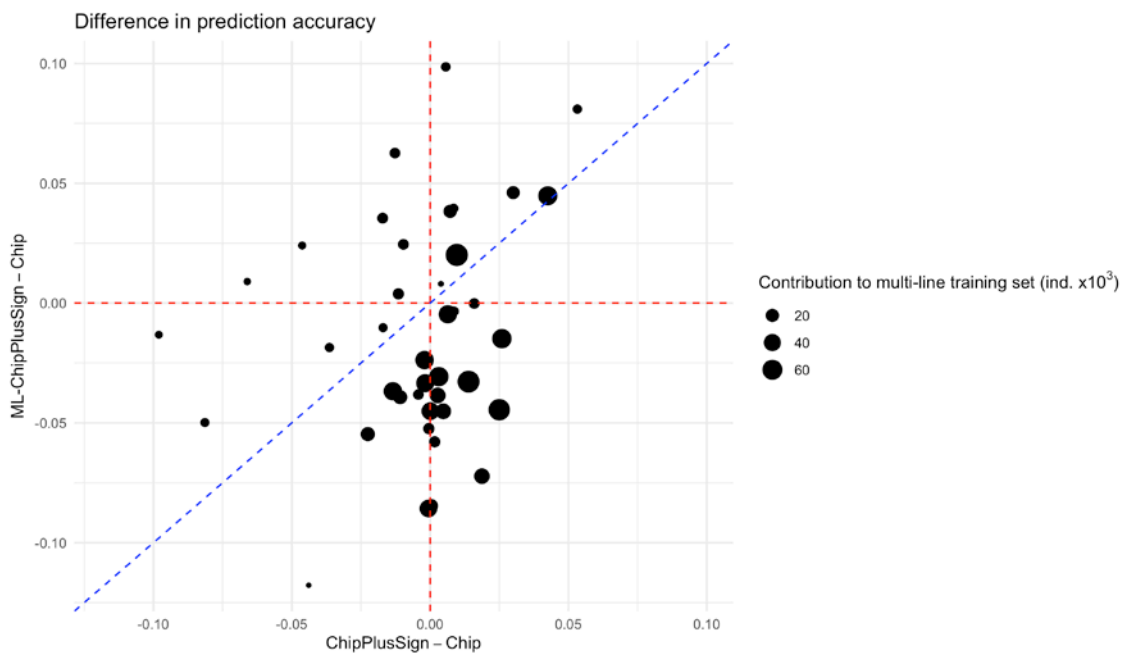

Comparison of the difference in genomic prediction accuracy in the multi-line scenarios (ML-ChipPlusSign) and in the within-line scenarios (ChipPlusSign), both respect to Chip in the within-line scenarios. Red dashed line at 1. Blue dashed line is the bisector.

## ML-Top40k

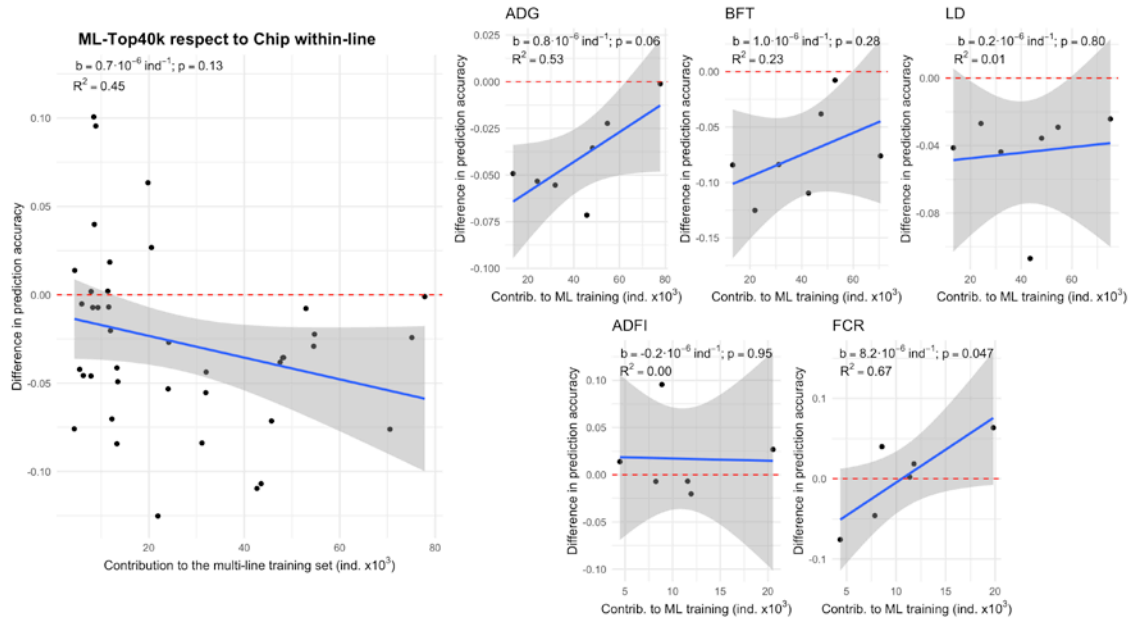

Difference of prediction accuracy between ML-Top40k and Chip in the within-line scenarios, for all traits and lines (left) or by trait (right). Red dashed line at 'no difference'. Regression coefficient ( $b$ ) and  $p$ -value of training set size is provided, as well as the coefficient of determination ( $R^2$ ) of the model. The linear model for the joint analyses included the trait effect.

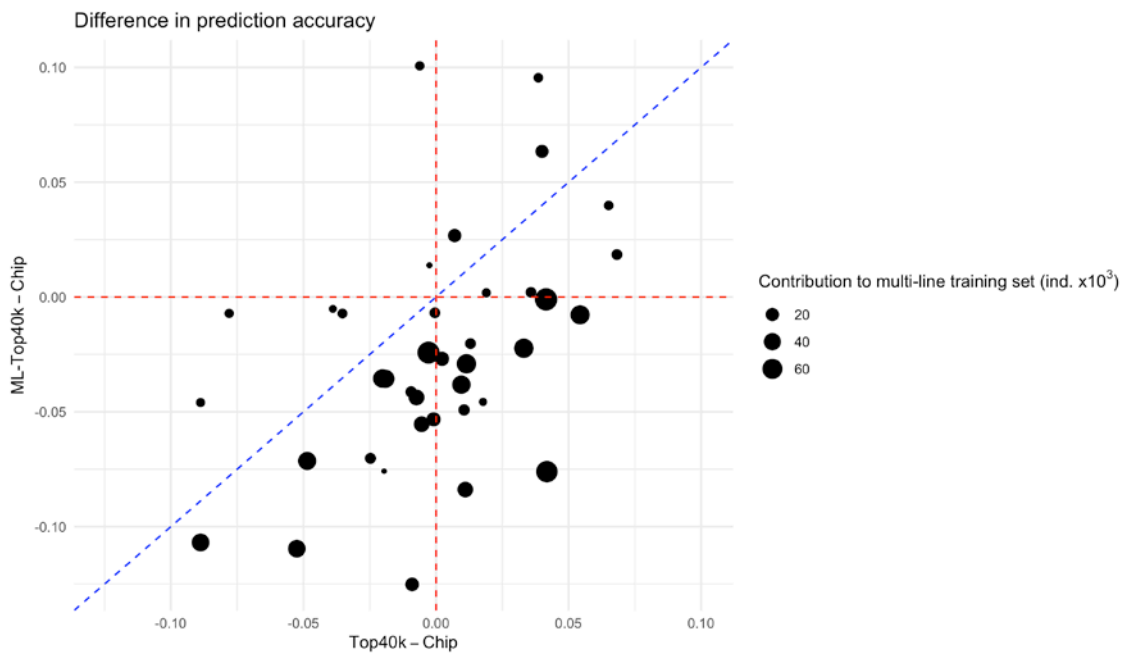

Comparison of the difference in genomic prediction accuracy in the multi-line scenarios (ML-Top40k) and in the within-line scenarios (Top40k), both respect to Chip in the within-line scenarios. Red dashed line at 1. Blue dashed line is the bisector.
